# Supplementary material
Source: publisher figshare collection journal article supplement (https://gsajournals.figshare.com/ndownloader/files/15078338)
Supplement: Supplementary file 1 [file 15078338]

SUPPLEMENTAL FIGURE


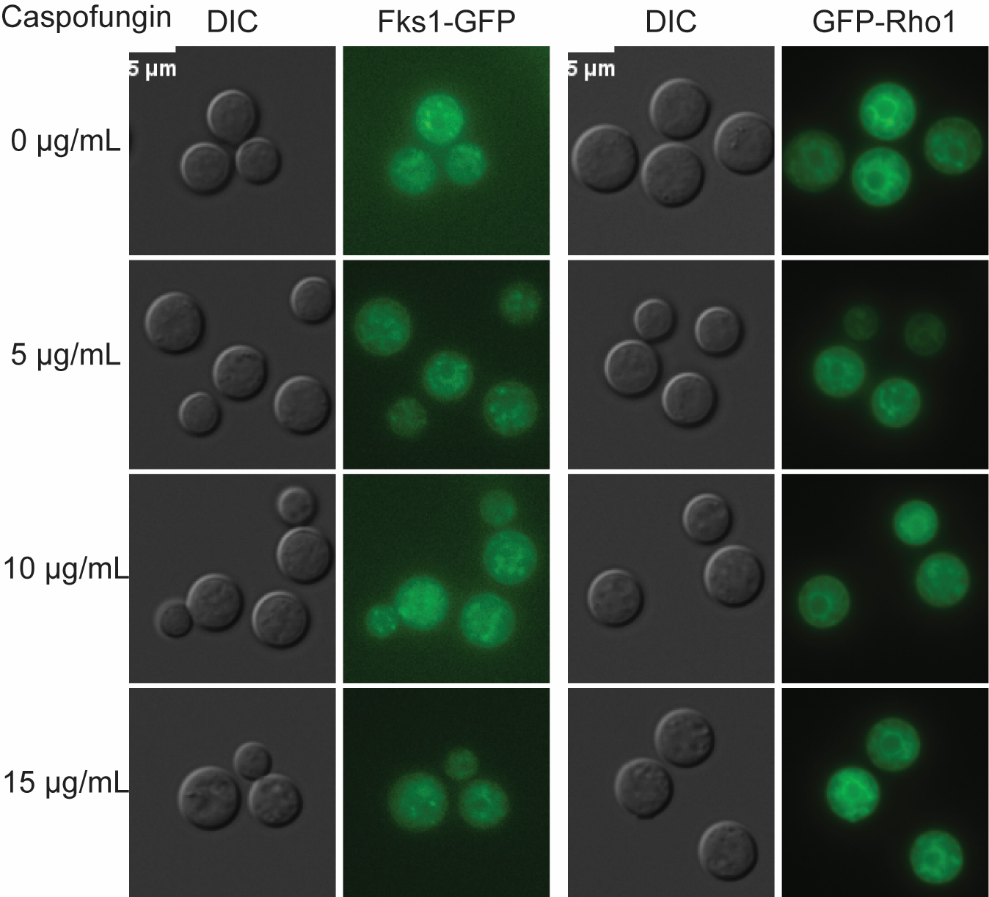


**Figure S1.** Fks1-GFP and GFP-Rho1 localization is not altered in response to caspofungin treatment. Strains expressing Fks1-GFP and GFP-Rho1 were incubated in SC with 0, 5, 10, or 15 µg/mL caspofungin for 1 hour and imaged on a Zeiss AxioVision epifluorescence microscope. Presented here are representative images from the 20-minute time point. Scale bars represent 5 microns.
